# Supplementary material for: Crystal structures, thermodynamics and accelerating thermal decomposition of RDX: two new energetic coordination polymers based on a Y-shaped ligand of tris(5-aminotetrazole)triazine
Source: Royal Society of Chemistry journal article supplement (doi:10.1039/c9nj03387d), 2019-01-01
Supplement: c9nj03387d1.pdf [file c9nj03387d1.pdf]

## **Crystal structures, thermodynamics and accelerating thermal decomposition of RDX: Two new energetic coordination polymers based on Y-shaped ligand of tris(5-aminotetrazole)triazine**

Shuo Wu<sup>a</sup>, Guowei Lin<sup>a</sup>, Zhengyi Yang<sup>a</sup>, Qi Yang<sup>a\*</sup>, Qing Wei<sup>a</sup>, Gang Xie<sup>a</sup>, Sanping Chen<sup>a\*</sup>, Shengli Gao<sup>a</sup>, Jack Y. Lu<sup>a,b\*</sup>

*a. Key Laboratory of Synthetic and Natural Functional Molecule Chemistry of Ministry of Education, College of Chemistry and Materials Science, Northwest University, Xi'an, Shaanxi 710127, China*

*b. Department of Chemistry, University of Houston-Clear Lake, 2700 Bay Area Blvd. Houston, TX 77058, U.S.A*

*\*E-mail: yangqi@nww.edu.cn, sanpingchen@126.com, lu@uhcl.edu*

### **Contents:**

**Table S1.** Crystal data and structure refinement details for **1** and **2**

**Table S2** Selected bond lengths (Å) for **1** and **2**.

**Table S3** Selected bond angles (°) for **1** and **2**.

**Table S4** Hydrogen bond lengths (Å) and angles(°) for **1** and **2**.

**Table S5** Experimental and smoothed molar heat capacities of ECPs **1** and **2** at pressure 101.3 kPa.

**Table S6** Thermodynamic functions of ECPs **1** and **2**, the enthalpy change, the entropy change and the gibbs free energy change by taking  $T = 298.15$  K as the benchmark.

**Table S7** Calculated parameters used in the detonation reactions for **1** and **2**.

**Table S8.** Calculated parameters of detonation velocity and detonation pressure for **1** and **2**.

**Figure S1** PXRD curve of **1**

**Figure S2** PXRD curve of **2**

**Table S1.** Crystal data and structure refinement details for **1** and **2**\*.

|                                                                             | <b>1</b>                                                                       | <b>2</b>                                                         |
|-----------------------------------------------------------------------------|--------------------------------------------------------------------------------|------------------------------------------------------------------|
| Empirical formula                                                           | Zn <sub>2</sub> C <sub>12</sub> H <sub>18</sub> O <sub>5</sub> N <sub>36</sub> | PbZnC <sub>6</sub> H <sub>6</sub> O <sub>2</sub> N <sub>18</sub> |
| CCDC                                                                        | 1884884                                                                        | 1848810                                                          |
| Formula weight                                                              | 875.35                                                                         | 634.85                                                           |
| Crystal system                                                              | Monoclinic                                                                     | Triclinic                                                        |
| Space group                                                                 | <i>P</i> 2 <sub>1</sub> / <i>c</i>                                             | <i>P</i> -1                                                      |
| <i>a</i> / Å                                                                | 12.4524(16)                                                                    | 7.2877(9)                                                        |
| <i>b</i> / Å                                                                | 9.1886(10)                                                                     | 7.4427(8)                                                        |
| <i>c</i> / Å                                                                | 25.7031(3)                                                                     | 13.6865(17)                                                      |
| $\alpha$ /°                                                                 | 90                                                                             | 83.102(7)                                                        |
| $\beta$ /°                                                                  | 93.345(3)                                                                      | 85.643(6)                                                        |
| $\gamma$ /°                                                                 | 90                                                                             | 81.066(5)                                                        |
| <i>V</i> / Å <sup>3</sup>                                                   | 2936.1(6)                                                                      | 726.8(15)                                                        |
| <i>Z</i>                                                                    | 4                                                                              | 2                                                                |
| $\rho_{\text{calc.}}$ /g·cm <sup>-3</sup>                                   | 1.980                                                                          | 2.901                                                            |
| $\mu$ /mm <sup>-1</sup>                                                     | 1.735                                                                          | 13.278                                                           |
| <i>F</i> (000)                                                              | 1760.0                                                                         | 592.0                                                            |
| GOOF on <i>F</i> <sup>2</sup>                                               | 1.046                                                                          | 0.998                                                            |
| <i>R</i> <sub>1</sub> / <i>wR</i> <sub>2</sub> [ <i>I</i> > 2σ( <i>I</i> )] | 0.0869/0.2461                                                                  | 0.0444/0.0925                                                    |
| <i>R</i> <sub>1</sub> / <i>wR</i> <sub>2</sub> [all data]                   | 0.1881/0.2899                                                                  | 0.0667/0.1011                                                    |

\*  $R_1 = \Sigma ||F_0| - |F_c|| / \Sigma |F_0|$ ,  $wR_2 = [\Sigma (F_0^2 - F_c^2) / \Sigma w(F_0^2)]^{1/2}$

**Table S2** Bond lengths for **1** and **2**.

| <b>1</b> | Atom                                                                                                | Atom  | Length/ Å  |
|----------|-----------------------------------------------------------------------------------------------------|-------|------------|
|          | Zn1                                                                                                 | O3    | 1.984(8)   |
|          | Zn1                                                                                                 | N19   | 2.100(10)  |
|          | Zn1                                                                                                 | N13   | 1.996(10)  |
|          | Zn2                                                                                                 | N11#1 | 2.126(10)  |
|          | Zn2                                                                                                 | N25   | 2.285(10)  |
|          | N11                                                                                                 | Zn2#2 | 2.126(10)  |
|          | Zn1                                                                                                 | N18   | 2.006(10)  |
|          | Zn1                                                                                                 | N8    | 2.339(10)  |
|          | Zn2                                                                                                 | O5    | 2.025(8)   |
|          | Zn2                                                                                                 | N36   | 2.010(10)  |
|          | Zn2                                                                                                 | N22   | 2.031(9)   |
|          | <sup>1</sup> +X,-1+Y,+Z; <sup>2</sup> +X,1+Y,+Z                                                     |       |            |
| <b>2</b> | Pb1                                                                                                 | O1#1  | 2.416(9)   |
|          | Pb1                                                                                                 | O2    | 2.426(8)   |
|          | Pb1                                                                                                 | N16#2 | 2.779 (10) |
|          | Zn1                                                                                                 | N1    | 1.969(9)   |
|          | Zn1                                                                                                 | N15#3 | 2.031(10)  |
|          | N15                                                                                                 | Zn1#3 | 2.031(10)  |
|          | Pb1                                                                                                 | O1    | 2.357(7)   |
|          | Pb1                                                                                                 | N2    | 2.785(11)  |
|          | Zn1                                                                                                 | O1    | 2.128(8)   |
|          | Zn1                                                                                                 | N9    | 1.966(9)   |
|          | Pb1#1                                                                                               | O1    | 2.416(8)   |
|          | Pb1#4                                                                                               | N16   | 2.779(10)  |
|          | <sup>1</sup> 1-X,1-Y,2-Z; <sup>2</sup> +X,+Y,1+Z; <sup>3</sup> 1-X,1-Y,1-Z; <sup>4</sup> +X,+Y,-1+Z |       |            |

**Table S3** Bond angles for **1** and **2**.

| <b>1</b> | Atom  | Atom | Atom  | Angle/°  |
|----------|-------|------|-------|----------|
|          | O3    | Zn1  | N18   | 117.7(4) |
|          | O3    | Zn1  | N8    | 83.5(3)  |
|          | N18   | Zn1  | N19   | 97.1(4)  |
|          | N19   | Zn1  | N8    | 174.2(3) |
|          | N13   | Zn1  | N19   | 101.9(4) |
|          | O5    | Zn2  | N11#1 | 85.3(4)  |
|          | O5    | Zn2  | N22   | 124.2(4) |
|          | N36   | Zn2  | O5    | 104.8(4) |
|          | N36   | Zn2  | N25   | 84.3(4)  |
|          | N22   | Zn2  | N11#1 | 101.3(4) |
|          | N12   | N11  | Zn2#2 | 122.3(8) |
|          | N17   | N18  | Zn1   | 126.5(8) |
|          | N20   | N19  | Zn1   | 127.4(7) |
|          | N35   | N36  | Zn2   | 128.5(8) |
|          | C8    | N25  | Zn2   | 124.4(8) |
|          | N12   | N13  | Zn1   | 126.5(8) |
|          | C7    | N22  | Zn2   | 127.2(9) |
|          | O3    | Zn1  | N19   | 91.7(4)  |
|          | O3    | Zn1  | N13   | 110.1(4) |
|          | N18   | Zn1  | N8    | 82.3(4)  |
|          | N13   | Zn1  | N18   | 127.6(4) |
|          | N13   | Zn1  | N8    | 82.9(4)  |
|          | O5    | Zn2  | N25   | 87.3(3)  |
|          | N11#1 | Zn2  | N25   | 172.5(4) |
|          | N36   | Zn2  | N11#1 | 97.6(4)  |
|          | N36   | Zn2  | N22   | 128.4(4) |
|          | N22   | Zn2  | N25   | 82.9(4)  |
|          | N10   | N11  | Zn2#2 | 125.2(8) |
|          | C6    | N18  | Zn1   | 125.0(8) |
|          | N21   | N19  | Zn1   | 121.6(7) |
|          | C4    | N8   | Zn1   | 121.8(7) |
|          | C12   | N36  | Zn2   | 122.2(8) |
|          | C9    | N25  | Zn2   | 121.3(8) |
|          | N21   | N22  | Zn2   | 124.5(7) |

<sup>1</sup>+X,-1+Y,+Z; <sup>2</sup>+X,1+Y,+Z

---

2

|       |     |       |          |
|-------|-----|-------|----------|
| O1    | Pb1 | O1#1  | 74.4(3)  |
| O1    | Pb1 | O2    | 95.1(3)  |
| O1#1  | Pb1 | N2    | 131.8(3) |
| O1#1  | Pb1 | N16#2 | 72.2(3)  |
| O2    | Pb1 | N16#2 | 148.1(3) |
| N1    | Zn1 | O1    | 96.9(4)  |
| N9    | Zn1 | O1    | 92.5(4)  |
| N9    | Zn1 | N15#3 | 107.1(4) |
| Pb1   | O1  | Pb1#1 | 105.6(3) |
| Zn1   | O1  | Pb1   | 120.7(3) |
| C1    | N1  | Zn1   | 137.9(8) |
| N3    | N2  | Pb1   | 126.6(7) |
| C6    | N9  | Zn1   | 139.5(9) |
| C5    | N15 | Zn1#3 | 136.2(8) |
| N17   | N16 | Pb1#4 | 119.6(8) |
| O1#1  | Pb1 | O2    | 80.0(3)  |
| O1    | Pb1 | N2    | 74.0(3)  |
| O1    | Pb1 | N16#2 | 92.4(3)  |
| O2    | Pb1 | N2    | 67.7(3)  |
| N16#2 | Pb1 | N2    | 143.9(3) |
| N1    | Zn1 | N15#3 | 102.9(4) |
| N9    | Zn1 | N1    | 148.2(4) |
| N15#3 | Zn1 | O1    | 92.0(4)  |
| Zn1   | O1  | Pb1#1 | 113.6(3) |
| N2    | N1  | Zn1   | 115.3(8) |
| N1    | N2  | Pb1   | 121.1(7) |
| N10   | N9  | Zn1   | 114.7(7) |
| N16   | N15 | Zn1#3 | 116.6(7) |
| N15   | N16 | Pb1#4 | 121.3(7) |

<sup>1</sup>1-X,1-Y,2-Z;<sup>2</sup>+X,+Y,1+Z;<sup>3</sup>1-X,1-Y,1-Z;<sup>4</sup>+X,+Y,-1+Z

---

**Table S4** Hydrogen bond lengths (Å) and angles (°) for **1** and **2**.

|          | D        | H   | A   | d(D-H)/Å | d(H-A)/Å | d(D-A)/Å  | D-H-A/°   |
|----------|----------|-----|-----|----------|----------|-----------|-----------|
| <b>1</b> | O1       | H1A | O2  | 0.85     | 2.38     | 2.793(15) | 110       |
|          | O1       | H1B | N29 | 0.85     | 2.13     | 2.938(16) | 158       |
|          | O2       | H2A | N9  | 0.85     | 2.47     | 3.155(14) | 164.9     |
|          | O2       | H2A | N13 | 0.85     | 2.62     | 3.339(14) | 144       |
|          | O2       | H2B | N10 | 0.85     | 2.09     | 2.846(14) | 148       |
|          | O2       | H2B | N21 | 0.85     | 2.59     | 3.068(12) | 116       |
|          | O3       | H3A | O2  | 0.92     | 1.74     | 2.557(13) | 145       |
|          | O3       | H3B | O2  | 0.91     | 2.51     | 3.305(13) | 145       |
|          | O4       | H4A | N21 | 0.85     | 2.35     | 3.159(14) | 159       |
|          | O4       | H4B | N3  | 0.85     | 2.28     | 2.917(14) | 132       |
|          | N5       | H5  | N28 | 0.87     | 2.00     | 2.865(14) | 174       |
|          | O5       | H5A | N20 | 0.90     | 2.40     | 3.249(14) | 156       |
|          | O5       | H5B | N17 | 0.90     | 2.15     | 2.802(14) | 129       |
|          | N9       | H9  | O1  | 0.87     | 1.99     | 2.853(15) | 174       |
|          | N14      | H14 | N33 | 0.87     | 1.96     | 2.826(14) | 173       |
|          | N23      | H23 | O4  | 0.87     | 1.97     | 2.785(14) | 155       |
|          | N27      | H27 | N4  | 0.87     | 2.03     | 2.894(14) | 174       |
|          | N32      | H32 | N15 | 0.87     | 1.92     | 2.769(14) | 165       |
|          | <b>2</b> | O1  | H1  | N18      | 0.85     | 2.05      | 2.870(12) |
| O2       |          | H2A | N11 | 0.89     | 2.51     | 3.307(14) | 119       |
| O2       |          | H2A | N12 | 0.89     | 2.52     | 3.266(14) | 142       |
| O2       |          | H2B | N17 | 0.89     | 1.97     | 2.686(13) | 137       |
| N5       |          | H5  | N4  | 0.88     | 1.99     | 2.859(14) | 169       |
| N13      |          | H13 | N7  | 0.88     | 2.46     | 3.319(13) | 167       |
| N14      |          | H14 | N12 | 0.88     | 1.95     | 2.813(14) | 165       |

**Table S5** Experimental and smoothed molar heat capacities of ECPs **1** and **2** at pressure 101.3 kPa.

| <i>T</i> /K | <b>1</b>                                    |         | <b>2</b>                                    |         |
|-------------|---------------------------------------------|---------|---------------------------------------------|---------|
|             | $C_{p,m}/(\text{J K}^{-1} \text{mol}^{-1})$ |         | $C_{p,m}/(\text{J K}^{-1} \text{mol}^{-1})$ |         |
|             | Exp.                                        | smooth  | Exp.                                        | smooth  |
| 293.15      | 588.35                                      | 589.36  | 930.18                                      | 931.46  |
| 296.15      | 627.95                                      | 629.05  | 930.03                                      | 929.24  |
| 299.15      | 663.43                                      | 664.60  | 930.12                                      | 928.61  |
| 302.15      | 695.11                                      | 696.35  | 930.69                                      | 929.57  |
| 305.15      | 724.39                                      | 724.62  | 932.94                                      | 932.15  |
| 308.15      | 749.96                                      | 749.75  | 936.87                                      | 936.33  |
| 311.15      | 771.73                                      | 772.07  | 942.52                                      | 942.14  |
| 314.15      | 790.57                                      | 791.92  | 949.81                                      | 949.58  |
| 317.15      | 808.28                                      | 809.63  | 958.79                                      | 958.66  |
| 320.15      | 824.19                                      | 825.54  | 969.50                                      | 969.39  |
| 323.15      | 838.63                                      | 839.97  | 981.89                                      | 981.77  |
| 326.15      | 851.94                                      | 853.27  | 995.97                                      | 995.82  |
| 329.15      | 864.23                                      | 865.76  | 1011.75                                     | 1011.54 |
| 332.15      | 876.48                                      | 877.78  | 1029.23                                     | 1028.94 |
| 335.15      | 888.37                                      | 889.67  | 1048.40                                     | 1048.03 |
| 338.15      | 901.46                                      | 901.75  | 1069.29                                     | 1068.82 |
| 341.15      | 913.08                                      | 914.37  | 1091.87                                     | 1091.31 |
| 344.15      | 926.55                                      | 927.84  | 1116.16                                     | 1115.52 |
| 347.15      | 941.21                                      | 942.52  | 1142.16                                     | 1141.45 |
| 350.15      | 957.76                                      | 958.73  | 1169.87                                     | 1169.11 |
| 353.15      | 975.49                                      | 976.80  | 1199.28                                     | 1198.51 |
| 356.15      | 995.26                                      | 997.08  | 1230.41                                     | 1229.66 |
| 359.15      | 1018.41                                     | 1019.88 | 1263.26                                     | 1262.57 |
| 362.15      | 1044.52                                     | 1045.55 | 1297.82                                     | 1297.23 |
| 365.15      | 1072.78                                     | 1074.43 | 1334.11                                     | 1333.67 |
| 368.15      | 1105.07                                     | 1106.84 | 1372.09                                     | 1371.89 |

Standard uncertainties *u* are  $u(p) = 1$  kPa,  $u(T) = 0.01$  K, relative uncertainty  $u_r(C_{p,m}) = 1.29\%$ .

**Table S6** Thermodynamic functions of ECPs **1** and **2**, the enthalpy change, the entropy change and the gibbs free energy change by taking  $T = 298.15$  K as the benchmark.

| $T/K$  | $H_T-H_{298.15}/(\text{kJ mol}^{-1})$ |          | $S_T-S_{298.15}/(\text{J K}^{-1} \text{mol}^{-1})$ |          | $G_T-G_{298.15}/(\text{kJ mol}^{-1})$ |            |
|--------|---------------------------------------|----------|----------------------------------------------------|----------|---------------------------------------|------------|
|        | <b>1</b>                              | <b>2</b> | <b>1</b>                                           | <b>2</b> | <b>1</b>                              | <b>2</b>   |
| 293.15 | -3.1011                               | -4.6460  | -10.488                                            | -15.715  | -2.6543E-2                            | -3.9148E-2 |
| 296.15 | -1.2784                               | -1.8568  | -4.3021                                            | -6.2487  | -4.3331E-3                            | -6.2475E-3 |
| 299.15 | 0.65681                               | 0.92812  | 2.1993                                             | 3.1077   | -1.1106E-3                            | -1.5485E-3 |
| 302.15 | 2.6927                                | 3.7135   | 8.9708                                             | 12.372   | -1.7827E-2                            | -2.4700E-2 |
| 305.15 | 4.8184                                | 6.5042   | 15.971                                             | 21.563   | -5.5151E-2                            | -7.5749E-2 |
| 308.15 | 7.0239                                | 9.3049   | 23.163                                             | 30.696   | -0.11378                              | -0.15407   |
| 311.15 | 9.3002                                | 12.121   | 30.514                                             | 39.789   | -0.19423                              | -0.25935   |
| 314.15 | 11.640                                | 14.956   | 37.996                                             | 48.859   | -0.29644                              | -0.39305   |
| 317.15 | 14.035                                | 17.817   | 45.585                                             | 57.920   | -0.42228                              | -0.55233   |
| 320.15 | 16.480                                | 20.706   | 53.259                                             | 66.990   | -0.57087                              | -0.74085   |
| 323.15 | 18.971                                | 23.631   | 61.003                                             | 76.082   | -0.74212                              | -0.95490   |
| 326.15 | 21.503                                | 26.595   | 68.802                                             | 85.213   | -0.93677                              | -1.1972    |
| 329.15 | 24.073                                | 29.604   | 76.646                                             | 94.396   | -1.1550                               | -1.4664    |
| 332.15 | 26.680                                | 32.663   | 84.530                                             | 103.65   | -1.3966                               | -1.7643    |
| 335.15 | 29.323                                | 35.776   | 92.450                                             | 112.98   | -1.6616                               | -2.0892    |
| 338.15 | 32.001                                | 38.949   | 100.40                                             | 122.40   | -1.9493                               | -2.4406    |
| 341.15 | 34.715                                | 42.186   | 108.40                                             | 131.93   | -2.2657                               | -2.8219    |
| 344.15 | 37.469                                | 45.494   | 116.43                                             | 141.59   | -2.6004                               | -3.2342    |
| 347.15 | 40.264                                | 48.877   | 124.52                                             | 151.37   | -2.9631                               | -3.6711    |
| 350.15 | 43.105                                | 52.341   | 132.67                                             | 161.31   | -3.3494                               | -4.1417    |
| 353.15 | 45.998                                | 55.889   | 140.89                                             | 171.40   | -3.7573                               | -4.6409    |
| 356.15 | 48.947                                | 59.529   | 149.21                                             | 181.66   | -4.1941                               | -5.1692    |
| 359.15 | 51.961                                | 63.265   | 157.64                                             | 192.11   | -4.6554                               | -5.7313    |
| 362.15 | 55.047                                | 67.102   | 166.20                                             | 202.75   | -5.1423                               | -6.3239    |
| 365.15 | 58.215                                | 71.045   | 174.91                                             | 213.59   | -5.6534                               | -6.9474    |
| 368.15 | 61.474                                | 75.101   | 183.79                                             | 224.65   | -6.1883                               | -7.6039    |

Standard uncertainties  $u$  are  $u(p) = 1\text{kPa}$ ,  $u(T) = 0.01$  K.

$$u(H_T-H_{298.15\text{K}}) = u_r(C_{p,m})(C_{p,m} / \text{J mol}^{-1} \text{K}^{-1})[T/\text{K}-298.15 \text{K}].$$

$$u(S_T-S_{298.15\text{K}}) = u_r(C_{p,m})(C_{p,m} / \text{J mol}^{-1} \text{K}^{-1})[\ln(T/298.15 \text{K})].$$



**Table S7.** Calculated parameters used in the detonation reactions for **1** and **2**.

|          | ECPs<br>(hartree) | ZnO<br>(hartree) | Pb<br>(hartree) | H <sub>2</sub> O<br>(hartree) | NH <sub>3</sub><br>(hartree) | C<br>(hartree) | N <sub>2</sub><br>(hartree) | $\Delta E_{\text{det}}$<br>(hartree) | $\Delta E_{\text{det}}$<br>(kcalg <sup>-1</sup> ) | $\Delta H_{\text{det}}$<br>(kcalg <sup>-1</sup> ) |
|----------|-------------------|------------------|-----------------|-------------------------------|------------------------------|----------------|-----------------------------|--------------------------------------|---------------------------------------------------|---------------------------------------------------|
| <b>1</b> | -2944.5869        | -142.0943        | -               | -76.3776                      | -56.5045                     | -37.738        | -109.447                    | 2.4088                               | 1.7268                                            | 1.992                                             |
| <b>2</b> | -1437.0478        | -142.0943        | -3.9251         | -76.3776                      | -56.5045                     | -37.738        | -109.447                    | 0.8251                               | 0.8155                                            | 0.965                                             |

**Table S8.** Calculated parameters of detonation velocity and detonation pressure for **1** and **2**.

|          | $\rho$ (g cm <sup>-3</sup> ) | $N$ (mol g <sup>-1</sup> ) | $M$ (g mol <sup>-1</sup> ) | $Q$ (kcal g <sup>-1</sup> ) | $D$ (km s <sup>-1</sup> ) | $P$ (GPa) |
|----------|------------------------------|----------------------------|----------------------------|-----------------------------|---------------------------|-----------|
| <b>1</b> | 1.980                        | 0.0259                     | 25.06                      | 1.992                       | 8.69                      | 35.41     |
| <b>2</b> | 2.901                        | 0.0168                     | 25.69                      | 0.965                       | 7.84                      | 34.75     |

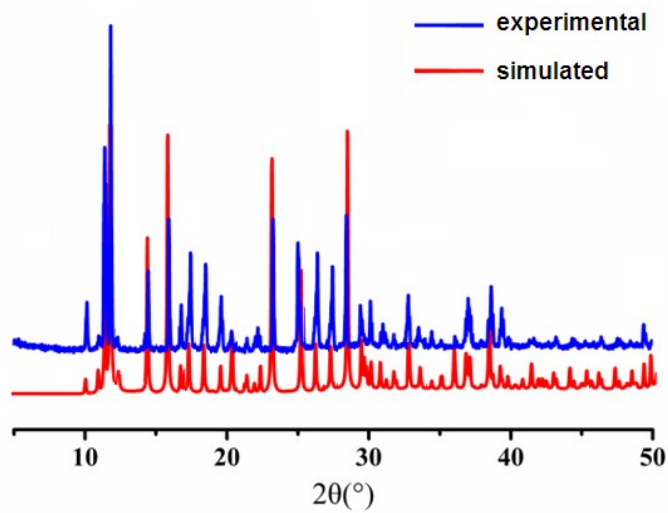

Figure S1 PXR curve of 1

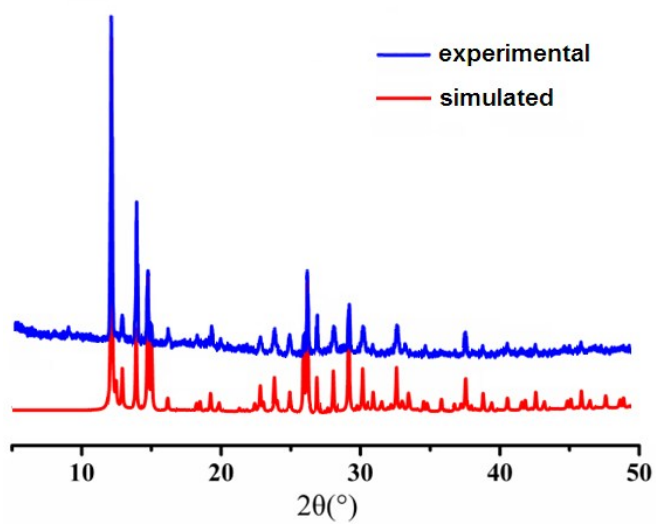

Figure S2 PXR curve of 2
